# Supplementary material
Source: Springer Nature journal article supplement (https://www.springermedizin.de/resource/supplementary/13054_2010_8782_MOESM3_ESM.pdf/9732558)
Supplement: MOESM3 [file 9732558]

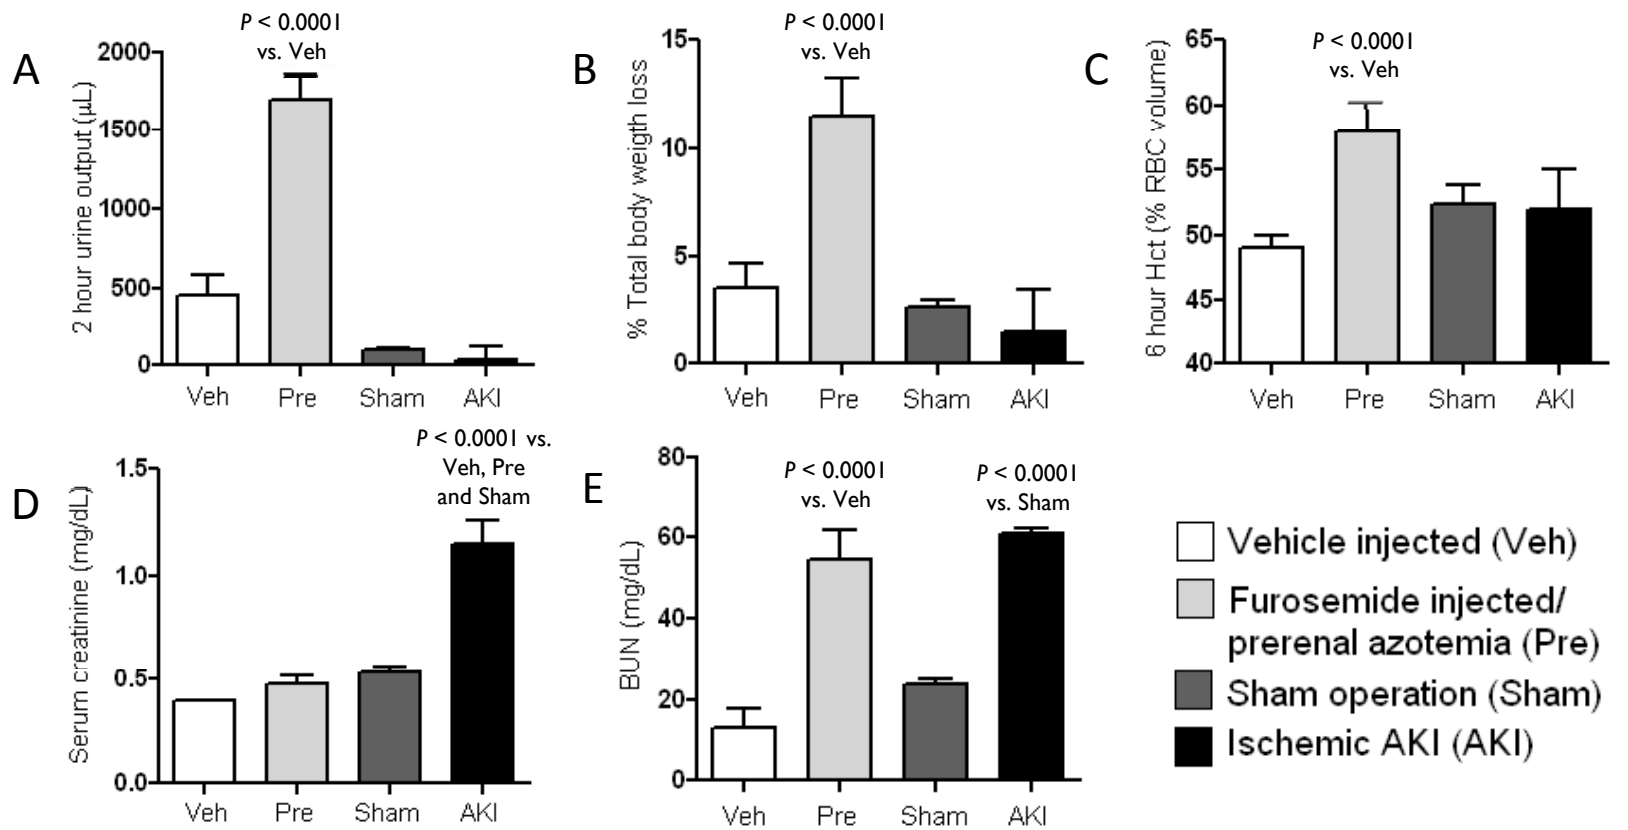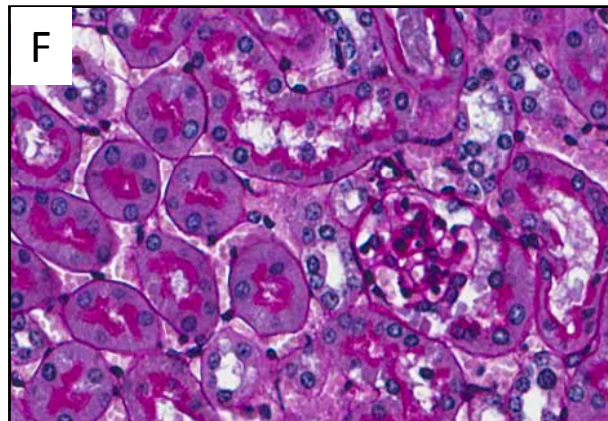

2 hour ischemic AKI (PAS, 20x)

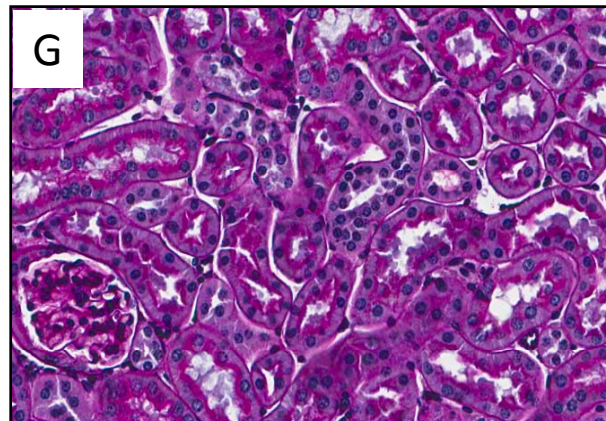

6 hour ischemic AKI (PAS, 20x)

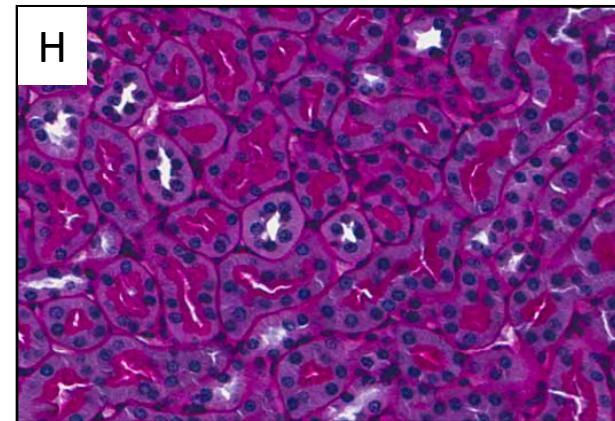

6 hour furosemide injected/  
prerenal azotemia (PAS, 20x)
